# Supplementary material for: In situ coating of a N, S co-doped porous carbon thin film on carbon nanotubes as an advanced metal-free bifunctional oxygen electrocatalyst for Zn–air batteries
Source: Royal Society of Chemistry journal article supplement (doi:10.1039/d1cy01818c), 2021-11-19
Supplement: d1cy01818c1.pdf [file d1cy01818c1.pdf]

## Supporting Information

### **In-situ coating N, S-codoped porous carbon thin film on carbon nanotubes as an advanced metal-free bifunctional oxygen electrocatalyst for Zn-air batteries**

**Xin Wang,<sup>a</sup> Guang-Lan Li,<sup>a\*</sup> Shuo Cao,<sup>a</sup> Zhong-Fa Lu,<sup>a</sup> Ce Hao,<sup>a</sup> Suli Wang,<sup>b</sup>**

**Gongquan Sun<sup>b</sup>**

*<sup>a</sup> State Key Laboratory of Fine Chemicals, Dalian University of Technology, Dalian 116023, PR China.*

*School of Chemical Engineering, Dalian University of Technology, Panjin 124221, PR China.*

*<sup>b</sup> Division of Fuel Cells and Battery, Dalian National Laboratory for Clean Energy, Dalian Institute of*

*Chemical Physics, Chinese Academy of Sciences, Dalian 116023, China; Key Laboratory of Fuel Cells &*

*Hybrid Power Sources, Chinese Academy of Sciences, Dalian 116023, China.*

\*Corresponding authors. E-mail addresses: [guanglanli@dlut.edu.cn](mailto:guanglanli@dlut.edu.cn) (G.-L. Li)

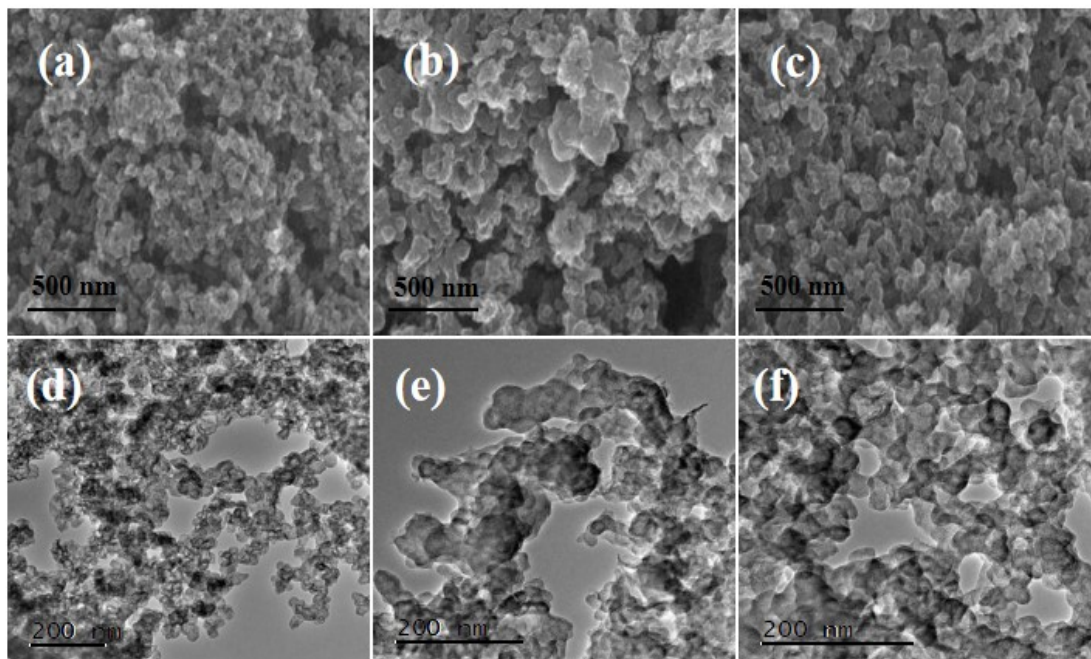

**Figure S1.** SEM images of (a) KB@NSCF, (b) VXC@NSCF, and (c) AC@NSCF catalysts; TEM images of (d) KB@NSCF, (e) VXC@NSCF, and (f) AC@NSCF catalysts.

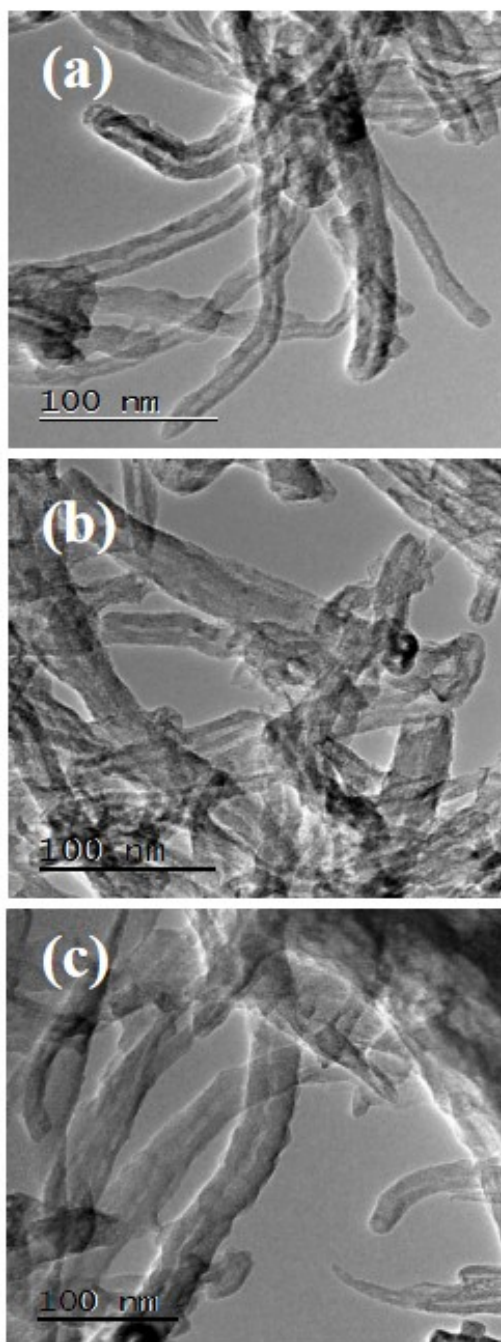

**Figure S2.** TEM images of (a) CNT@NSCF<sub>0</sub>, (b) NCF@CNT, and (c) CNT@NSCF.

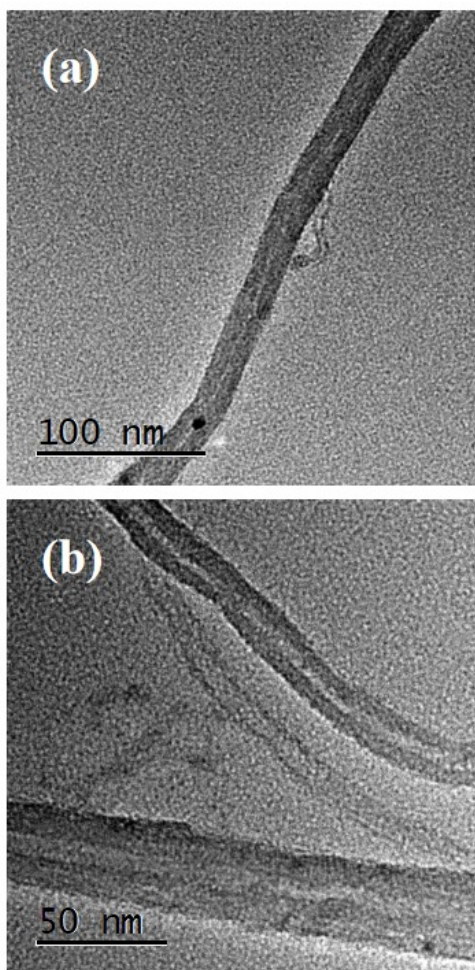

**Figure S3.** TEM images of CNT.

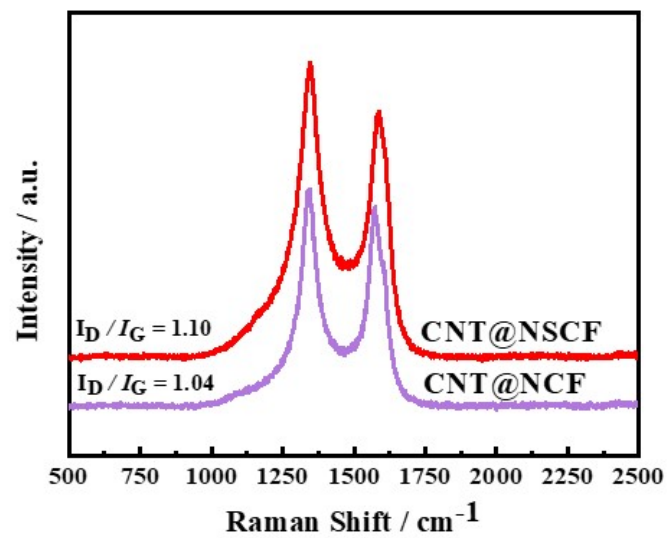

**Figure S4.** Raman spectra of CNT@NSCF and CNT@NCF catalysts.

**Table S1** The parameters of porous structures based on BET data for the prepared samples.

| Samples  | Specific surface area<br>( $\text{m}^2 \text{g}^{-1}$ ) | Total pore volume<br>( $\text{cm}^3 \text{g}^{-1}$ ) | Average pore diameter<br>(nm) |
|----------|---------------------------------------------------------|------------------------------------------------------|-------------------------------|
| CNT@NSCF | 748.4                                                   | 1.45                                                 | 4.78                          |
| KB@NSCF  | 949.7                                                   | 1.84                                                 | 5.91                          |
| VXC@NSCF | 553.3                                                   | 0.994                                                | 4.25                          |
| AC@NSCF  | 525.8                                                   | 0.899                                                | 4.18                          |

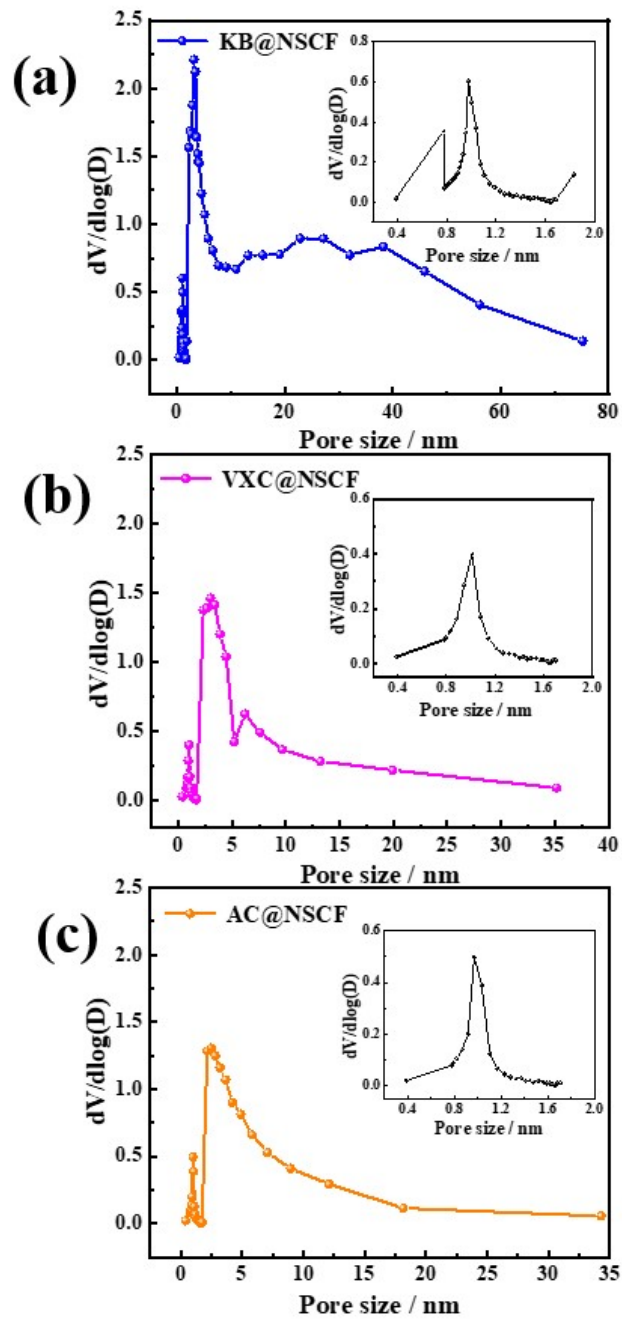

**Figure S5.** The pore distribution curves of KB@NSCF, VXC@NSCF, and AC@NSCF catalysts.

Insets: enlarged views of the corresponding micropore distribution curves.

**Table S2** Element contents (at. %) of CNT, KB, VXC, and AC derived from XPS.

| Element   | CNT   | KB    | VXC   | AC    |
|-----------|-------|-------|-------|-------|
| C (at. %) | 91.75 | 99.11 | 98.28 | 99.02 |
| O (at. %) | 8.25  | 0.89  | 1.72  | 0.98  |



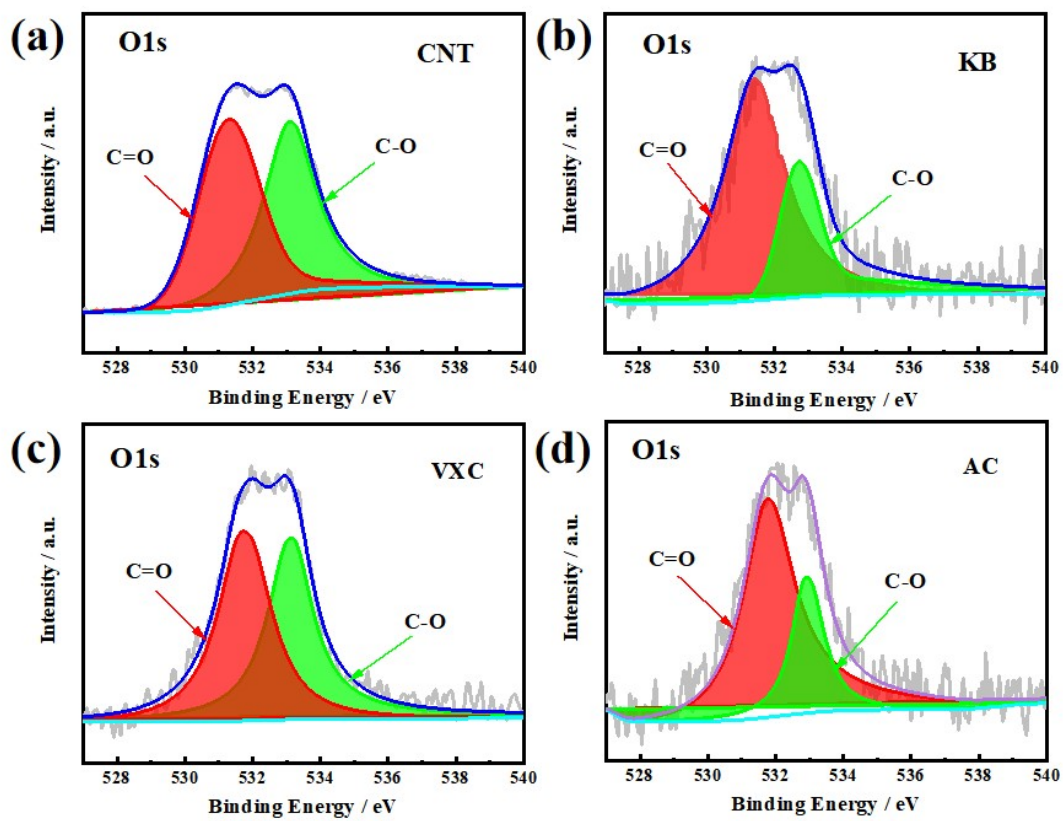

**Figure S6.** High resolution O 1s XPS spectra of (a) CNT; (b) KB; (c) VXC; and (d) AC.

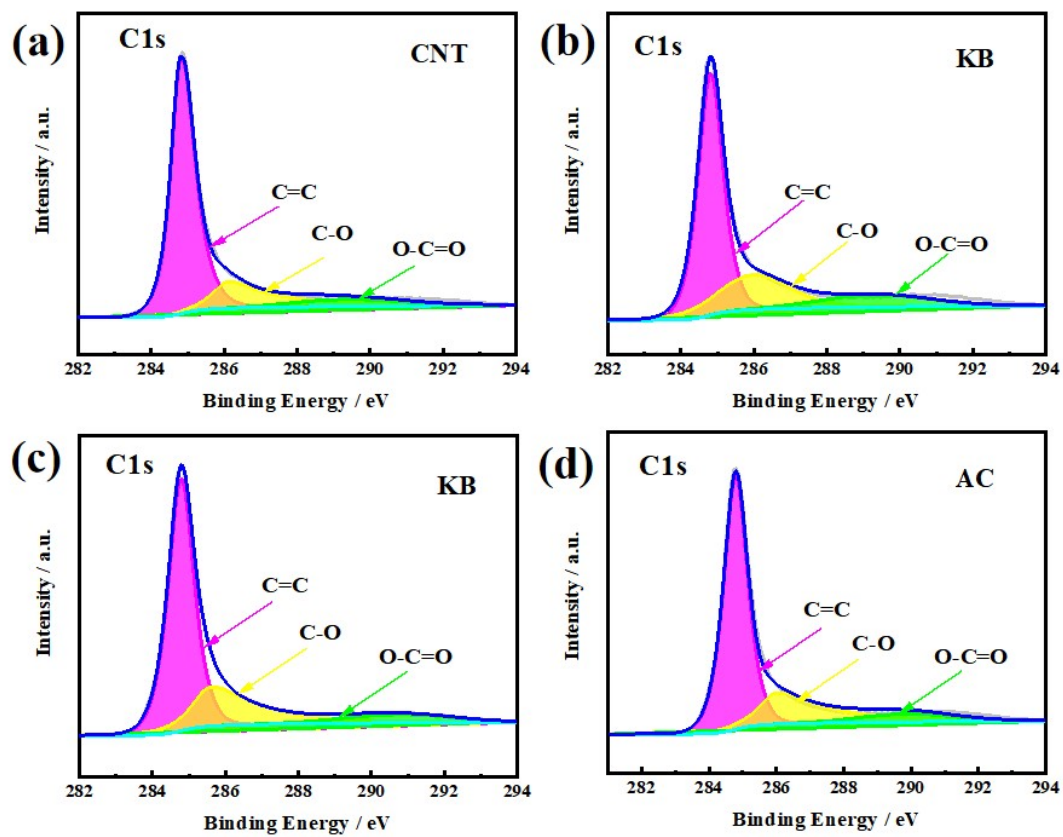

**Figure S7.** High resolution C1s XPS spectra of (a) CNT; (b) KB; (c) VXC; and (d) AC.

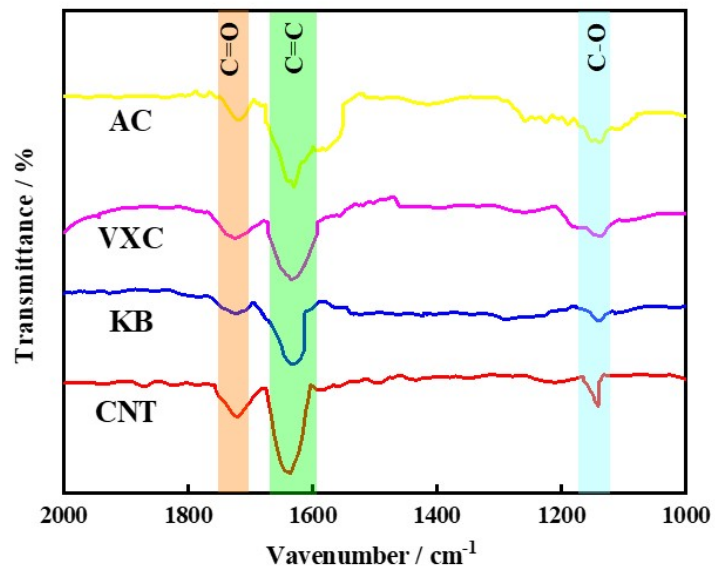

**Figure S8.** FTIR spectra of CNT, KB, VXC and AC.

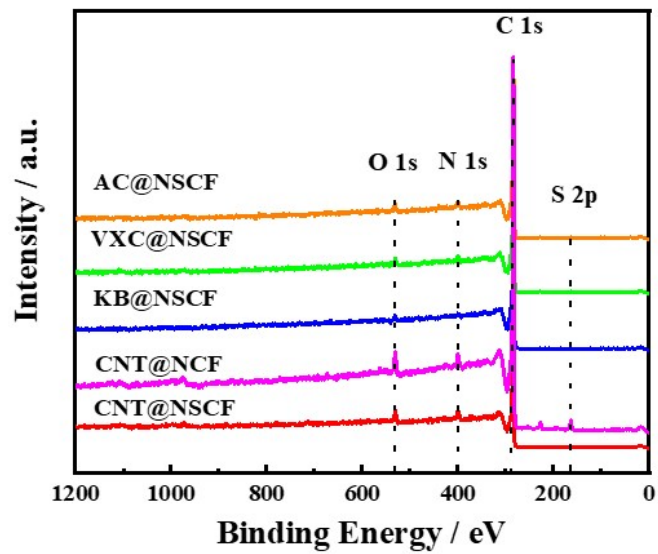

**Figure S9.** XPS spectra of CNT@NSCF, KB@NSCF, VXC@NSCF, and AC@NSCF.

**Table S3.** The element contents (at. %) of N, S, C, and O based on the XPS.

| Element     | CNT@NSCF | CNT@NSCF <sub>0</sub> | KB@NSCF | VXC@NSCF | AC@NSCF | CNT@NCF |
|-------------|----------|-----------------------|---------|----------|---------|---------|
| O (at. %)   | 3.81     | 6.57                  | 1.17    | 1.99     | 2.23    | 3.19    |
| C (at. %)   | 90.63    | 84.56                 | 94.61   | 94.57    | 94.63   | 91.75   |
| S (at. %)   | 0.38     | 0.90                  | 0.27    | 0.37     | 0.31    | /       |
| N (at. %)   | 5.18     | 7.98                  | 3.95    | 3.07     | 2.83    | 5.06    |
| N+S (at. %) | 5.56     | 8.88                  | 4.22    | 3.44     | 3.14    | /       |

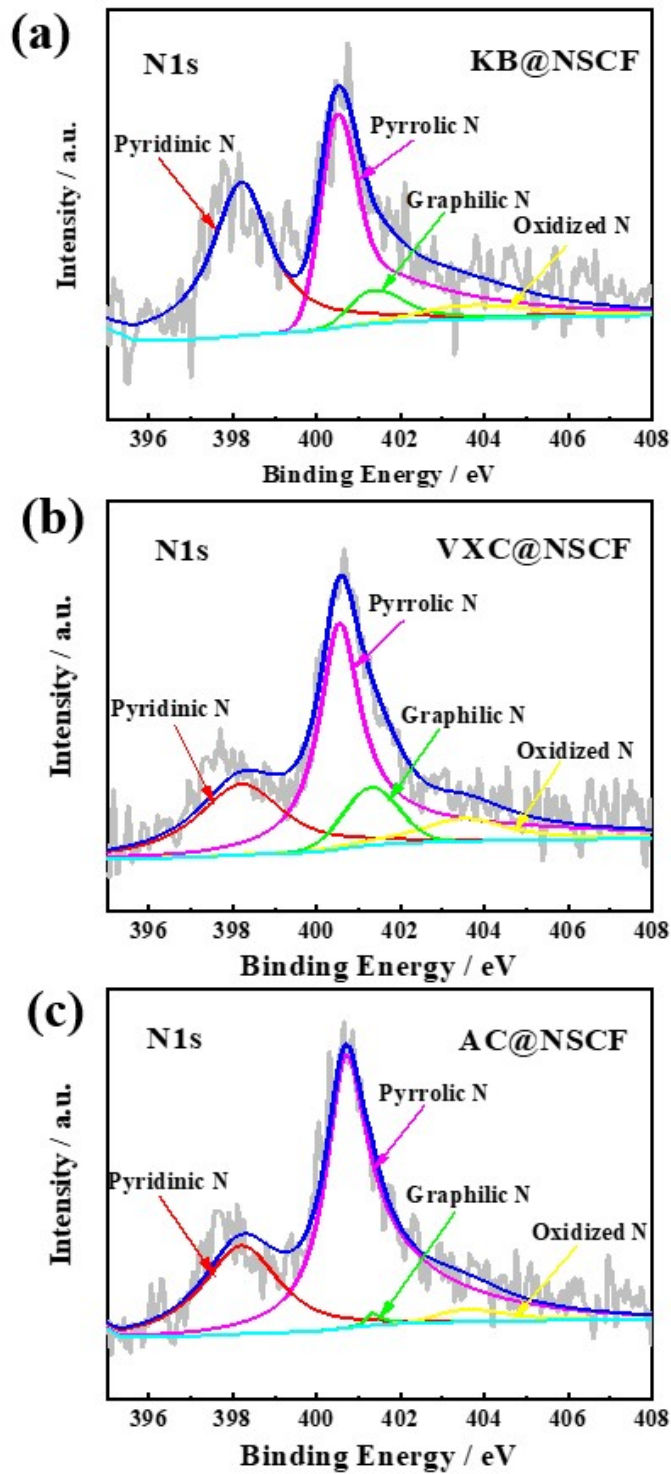

**Figure S10.** High resolution N1s XPS spectra of (a) KB@NSCF, (b) VXC@NSCF, and (c) AC@NSCF.

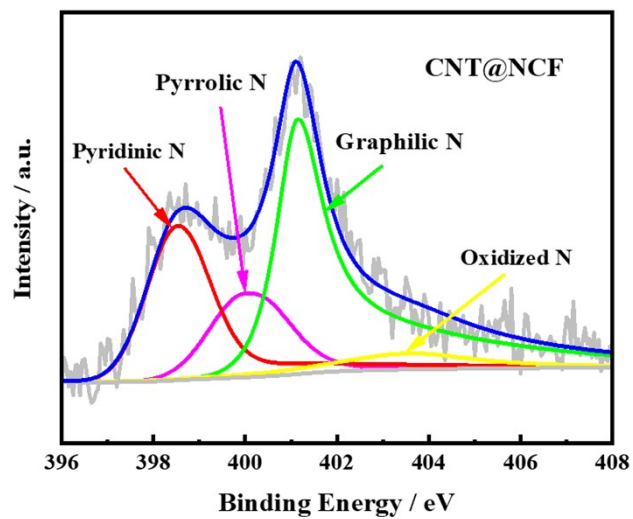

**Figure S11.** High resolution N 1s XPS spectrum of CNT@NCF.

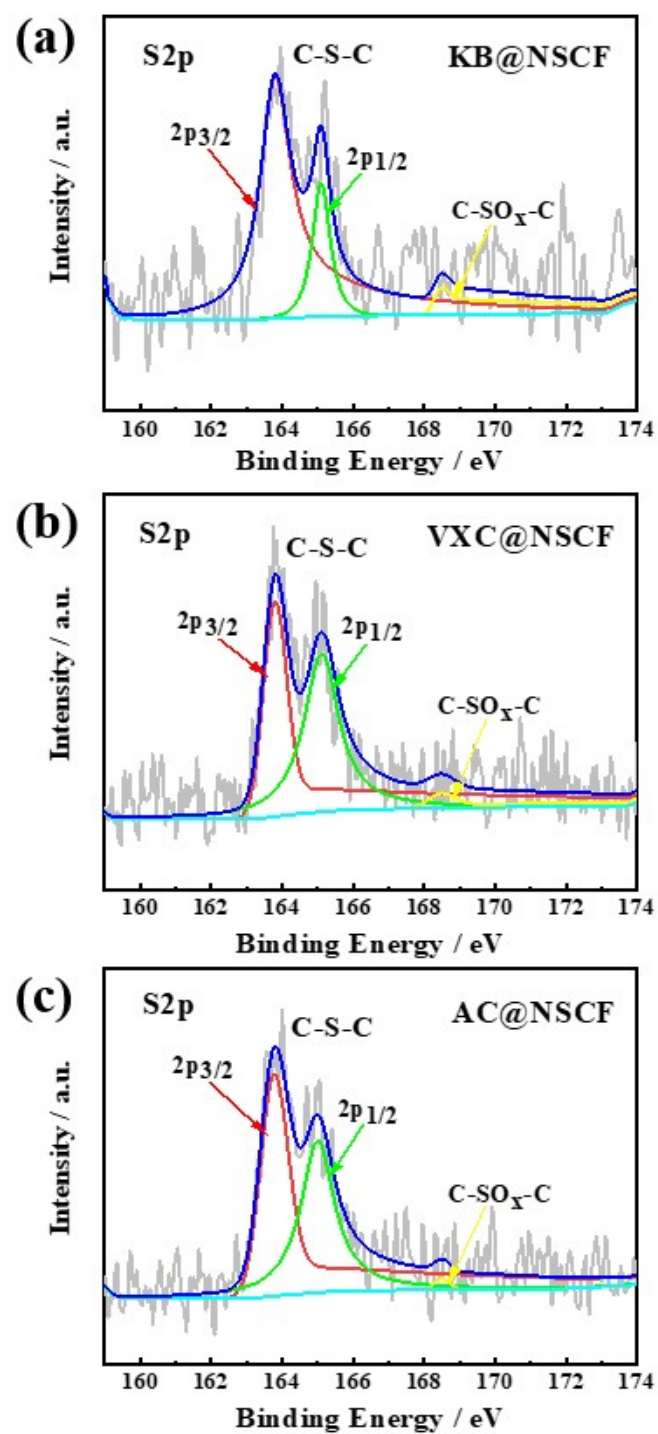

**Figure S12.** High resolution S 2p XPS spectra of (a) KB@NSCF, (b) VXC@NSCF, and (c) AC@NSCF.



**Table S4** The percentage of N species and S species derived from high-resolution N 1s and S 2p spectra of catalysts.

| Species         | CNT@NSCF | CNT@NSCF <sub>0</sub> | KB@NSCF | VXC@NSCF | AC@NSCF | CNT@NCF |
|-----------------|----------|-----------------------|---------|----------|---------|---------|
| Graphitic N (%) | 14.75    | /                     | 11.41   | 10.87    | 7.89    | 50.02   |
| Pyridinic N (%) | 55.46    | 82.22                 | 35.7    | 23.4     | 20.14   | 20.88   |
| Pyrrolic N (%)  | 25.48    | 17.78                 | 41.02   | 55.84    | 60.95   | 16.88   |
| Oxidic N (%)    | 4.31     | /                     | 11.87   | 9.89     | 11.02   | 12.22   |
| thiophene S (%) | 98.36    | 28.18                 | 93.23   | 94.61    | 97.65   | /       |
| Oxidic S (%)    | 1.64     | 71.82                 | 6.77    | 5.39     | 2.35    | /       |

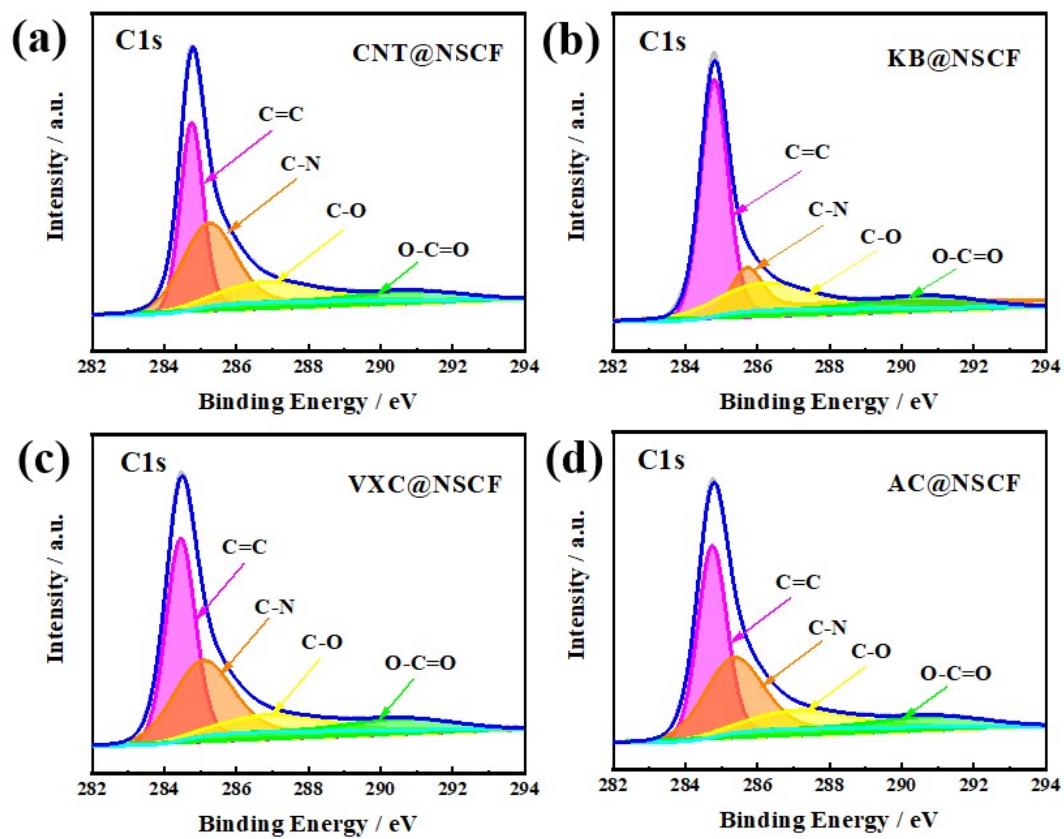

**Figure S13.** High resolution C1s XPS spectra of (a) CNT@NSCF, (b) KB@NSCF, (c) VXC@NSCF, and (d) AC@NSCF.

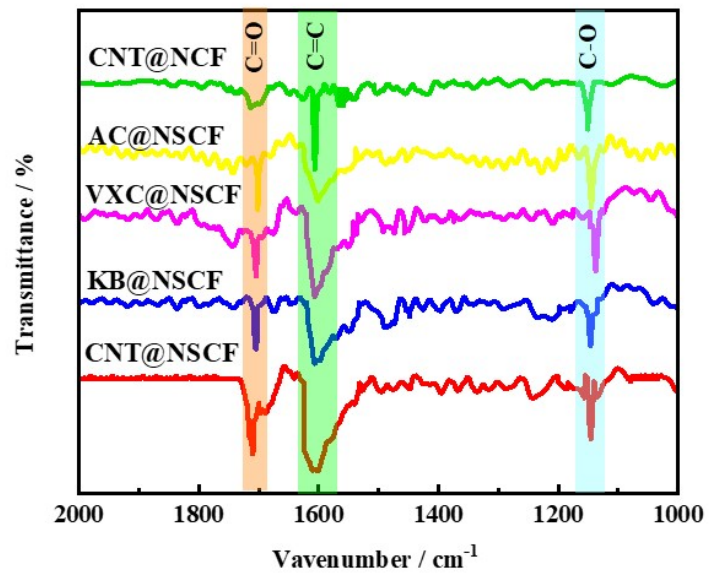

**Figure S14.** FTIR spectra of CNT@NSCF, KB@NSCF, VXC@NSCF, AC@NSCF and CNT@NCF.

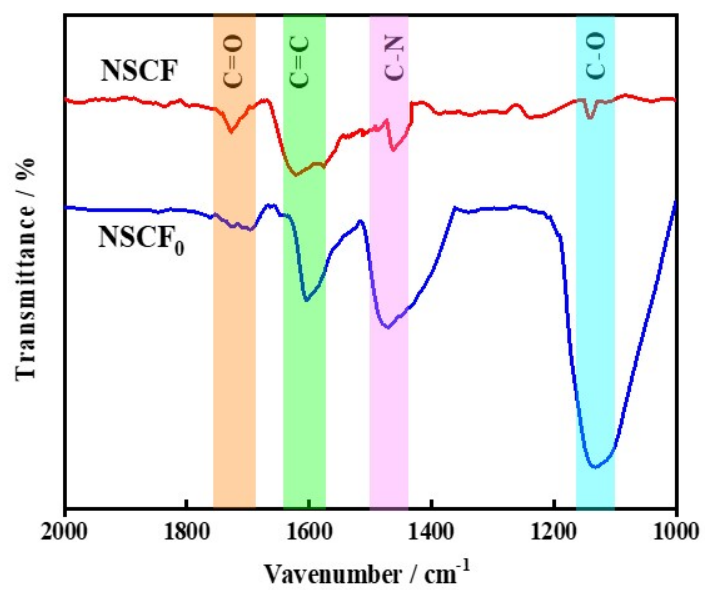

**Figure S15.** FTIR spectra of NSCF<sub>0</sub> and NSCF.

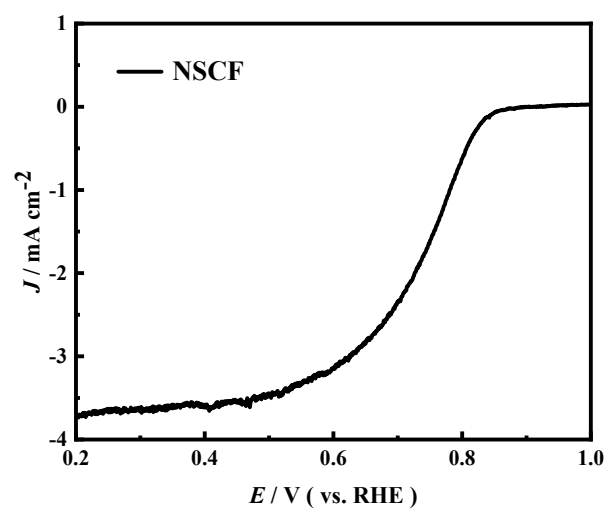

**Figure S16.** ORR LSV curves of NSCF recorded at 1600 rpm and  $10 \text{ mV s}^{-1}$ .

**Table S5** The ORR onset potential, half-wave potential and limiting current density of CNT@NSCF, KB@NSCF, VXC@NSCF, AC@NSCF, and Pt/C in 0.1 M KOH.

|                                      | CNT@NSCF | KB@NSCF | VXC@NSCF | AC@NSCF | NSCF | Pt/C |
|--------------------------------------|----------|---------|----------|---------|------|------|
| $E_{\text{onset}} / \text{V}$        | 0.94     | 0.90    | 0.88     | 0.89    | 0.84 | 0.97 |
| $E_{1/2} / \text{V}$                 | 0.82     | 0.79    | 0.77     | 0.79    | 0.73 | 0.84 |
| $j_{\text{lim}} / \text{mA cm}^{-2}$ | 5.98     | 5.72    | 5.14     | 3.62    | 3.73 | 4.98 |

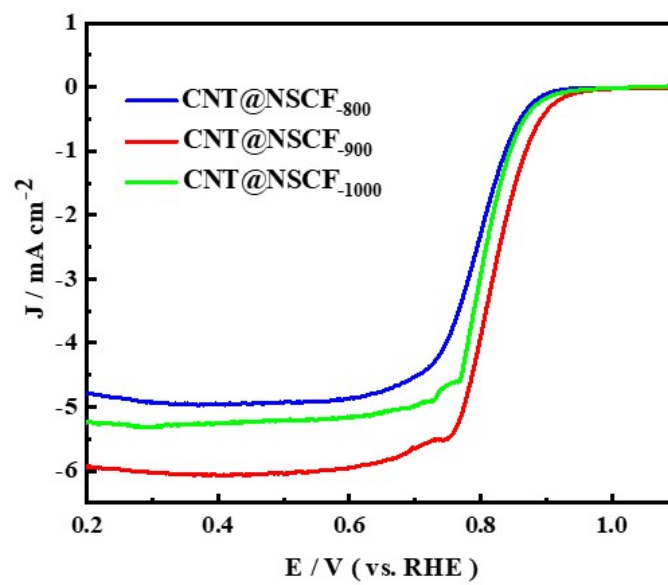

**Figure S17.** ORR LSV curves of CNT@NSCF at different temperature recorded at 1600 rpm and 10 mV s<sup>-1</sup>.

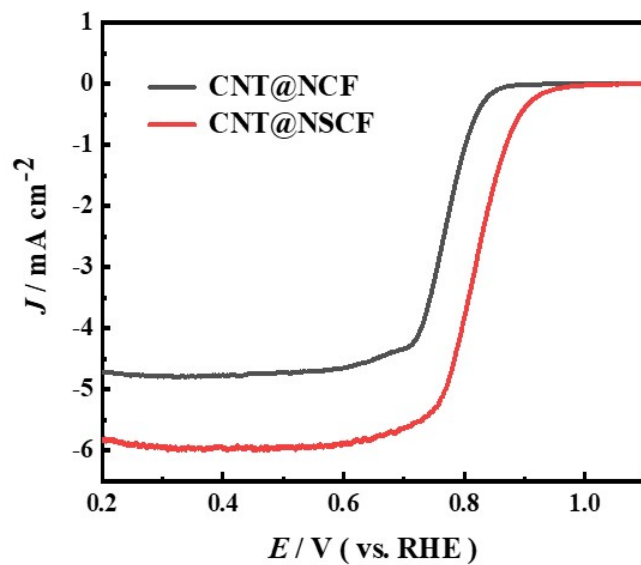

**Figure S18.** ORR LSV curves of CNT@NSCF and CNT@NCF recorded at 1600 rpm and 10 mV

$\text{s}^{-1}$ .



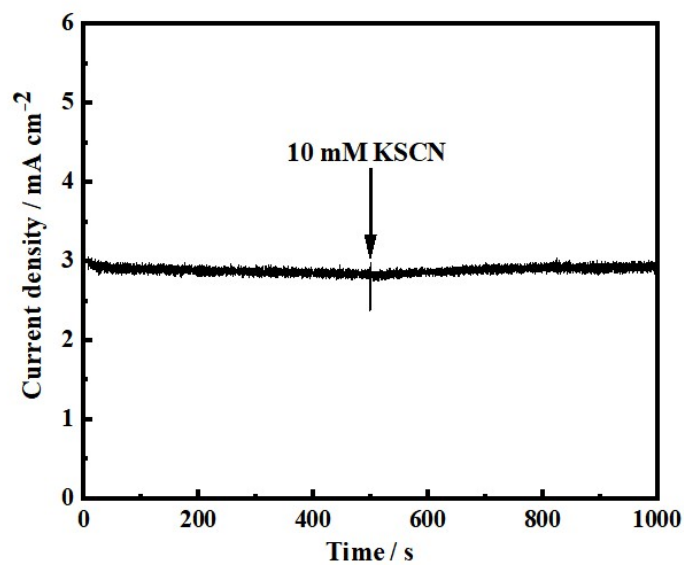

**Figure S19.** Chronoamperometric response of CNT@NSCF in O<sub>2</sub>-saturated 0.10 M KOH with the addition of KSCN (resulting in an electrolyte with 0.01 M KSCN).

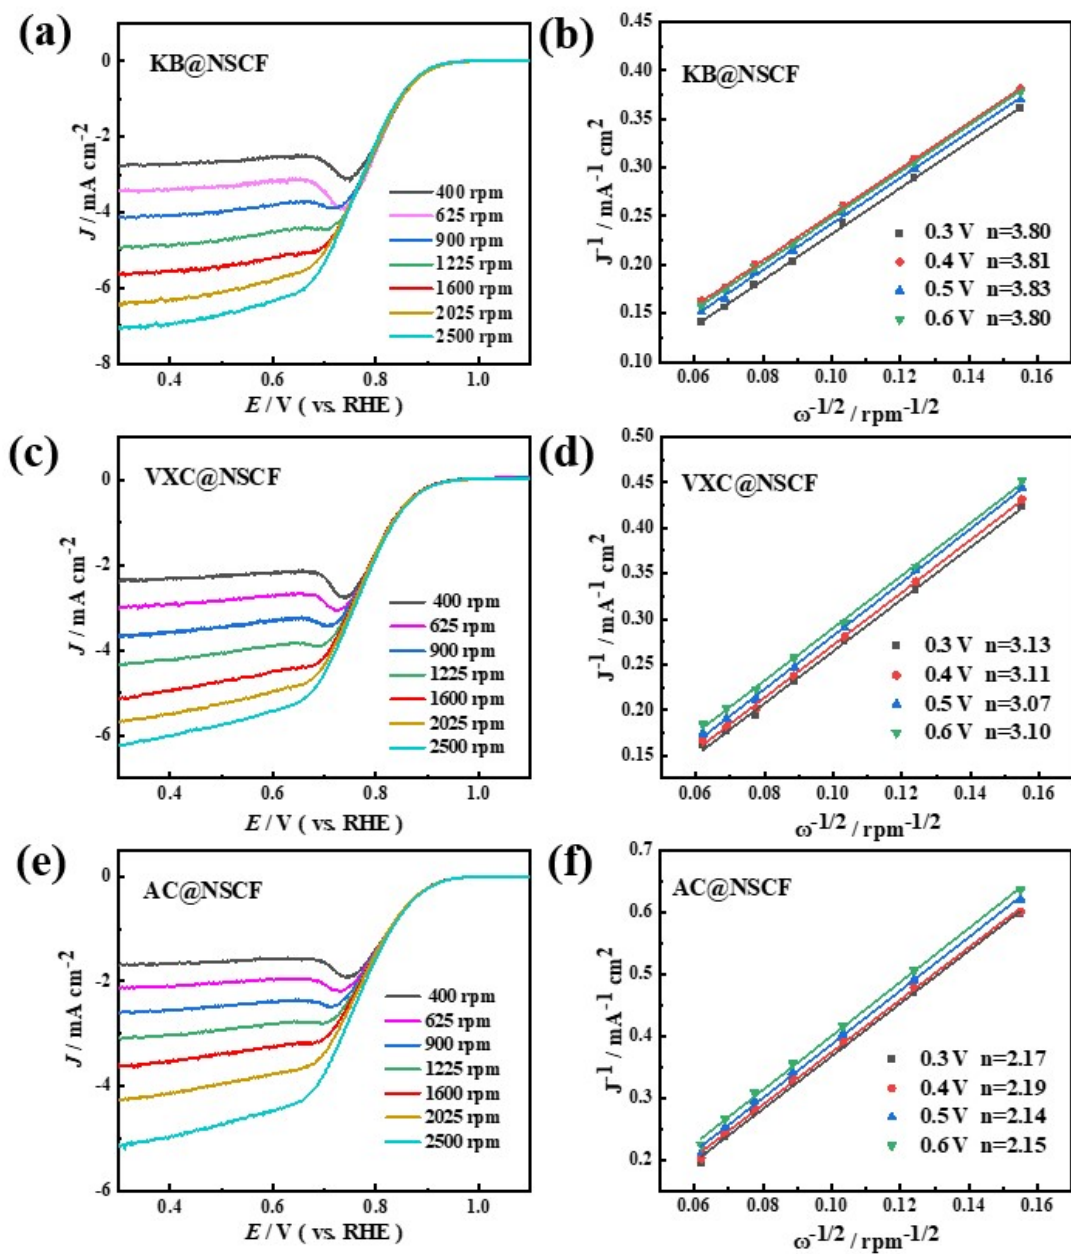

**Figure S20.** (a, c, e) ORR polarization curves of KB@NSCF, VXC@NSCF, and AC@NSCF recorded at different rotation speeds. (b, d, f) Linearly fitted K-L curves at different potential of KB@NSCF, VXC@NSCF, and AC@NSCF.

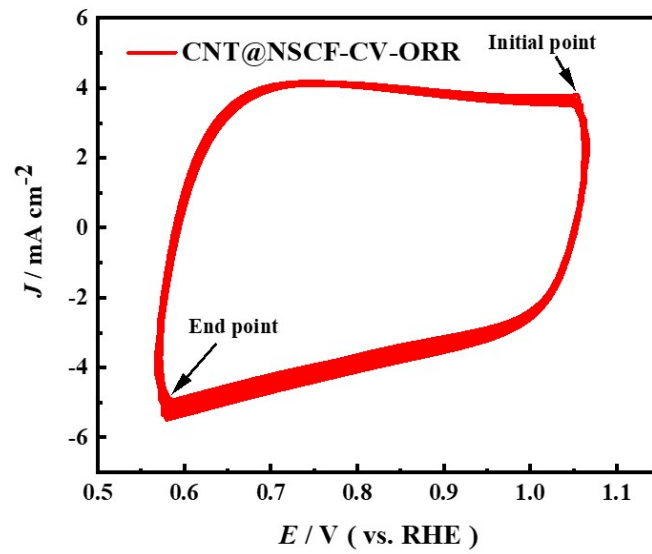

**Figure S21.** ORR cyclic measurements of CNT@NSCF at a scan rate of  $100 \text{ mV s}^{-1}$  for 8000 cycles.

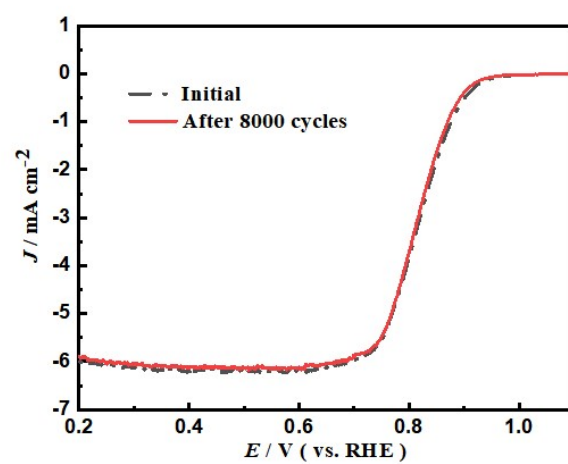

**Figure S22.** ORR curves of CNT@NSCF recorded at the first cycle and after 8000 cycles in an O<sub>2</sub>-saturated 0.1 m KOH electrolyte.

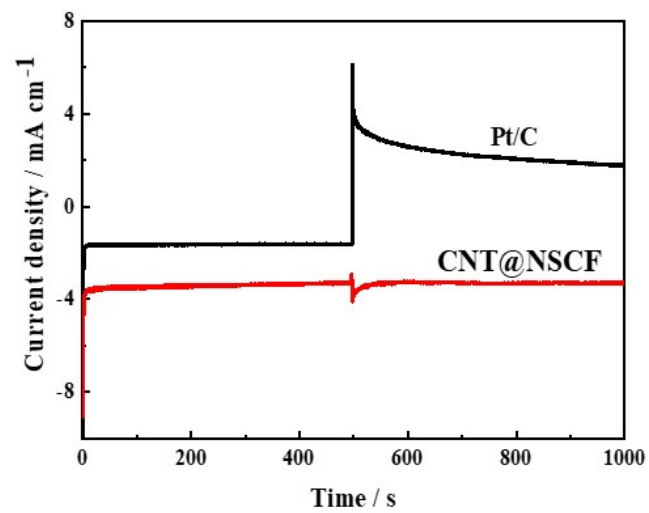

**Figure S23.** The methanol tolerance test of CNT@NSCF and Pt/C catalysts in an O<sub>2</sub>-saturated 0.1 M KOH with 3.0 M CH<sub>3</sub>OH.

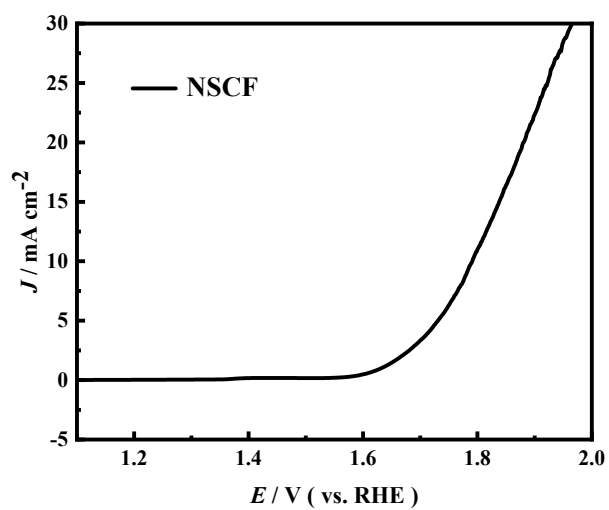

**Figure S24.** OER LSV curves of NSCF recorded at 1600 rpm and  $10 \text{ mV s}^{-1}$ .

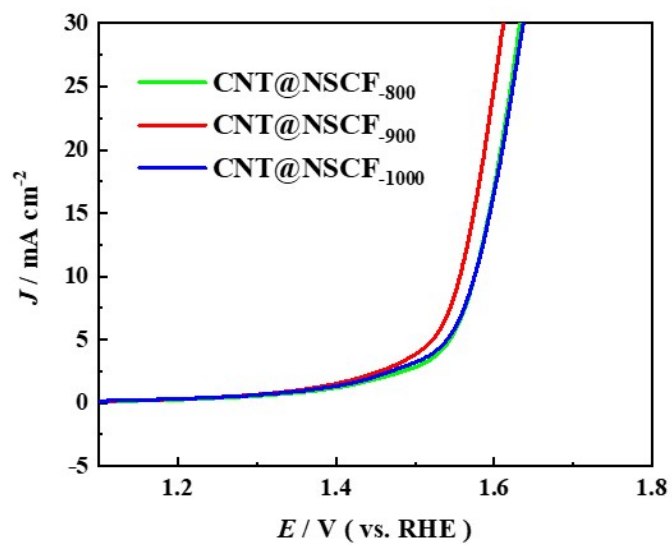

**Figure S25.** OER LSV curves of CNT@NSCF at different temperature recorded at 1600 rpm and  $10 \text{ mV s}^{-1}$ .

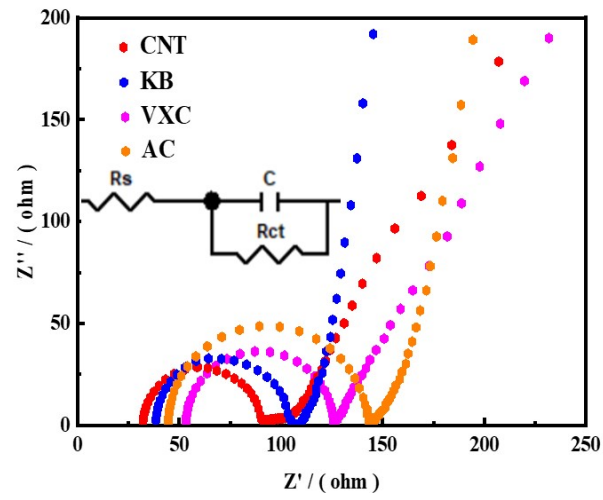

**Figure S26.** EIS Nyquist plots for the CNT, KB, VXC, and AC .



**Table S6** The EIS fitting results ( $R_{ct}$ ) of supports and catalysts.

| catalysts | $R_{ct} / \Omega$ | support | $R_{ct} / \Omega$ | $\Delta R_{ct} / \Omega$ |
|-----------|-------------------|---------|-------------------|--------------------------|
| CNT@NSCF  | 69.35             | CNT     | 58.59             | 10.76                    |
| KB@NSCF   | 93.27             | KB      | 66.85             | 26.42                    |
| VXC@NSCF  | 104.0             | VXC     | 72.51             | 31.49                    |
| AC@NSCF   | 114.8             | AC      | 98.85             | 15.95                    |

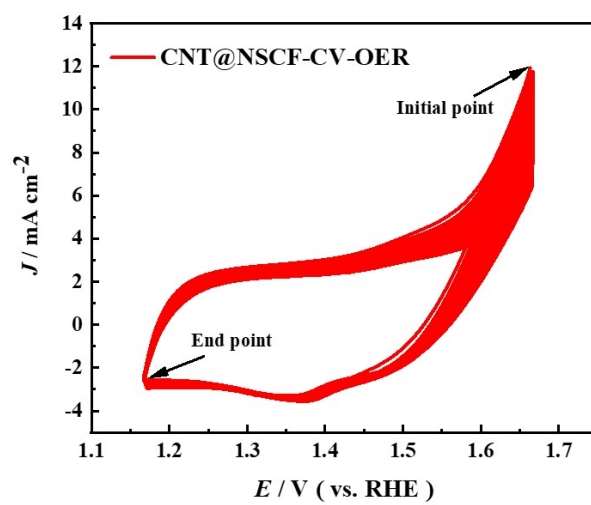

**Figure S27.** OER cyclic measurements of CNT@NSCF at a scan rate of  $100 \text{ mV s}^{-1}$  for 2000 cycles.

**Table S7.** The onset potential and half-wave potential of the ORR; the potential of OER at  $j=10$  mA cm<sup>-2</sup>; and the potential difference of CNT@NSCF, KB@NSCF, VXC@NSCF, AC@NSCF, NSCF, and Pt/C+RuO<sub>2</sub> in 0.1 M and 1 M KOH electrolyte.

| Samples               | $E_{\text{onset}}/\text{V}$ | $E_{1/2}/\text{V}$ | $E_{j=10 \text{ mA cm}^{-2}}/\text{V}$ |       | $\Delta E = E_{j=10 \text{ mA cm}^{-2}} - E_{1/2} / \text{mV}$ |       |
|-----------------------|-----------------------------|--------------------|----------------------------------------|-------|----------------------------------------------------------------|-------|
|                       |                             |                    | 1 M                                    | 0.1 M | 1 M                                                            | 0.1 M |
|                       |                             |                    | CNT@NSCF                               | 0.94  | 0.82                                                           | 1.56  |
| KB@NSCF               | 0.90                        | 0.79               | 1.58                                   | 1.69  | 790                                                            | 900   |
| VXC@NSCF              | 0.88                        | 0.77               | 1.71                                   | 1.80  | 940                                                            | 1030  |
| AC@NSCF               | 0.89                        | 0.79               | 1.73                                   | 1.81  | 940                                                            | 1020  |
| NSCF                  | 0.84                        | 0.73               | 1.78                                   | 1.87  | 1050                                                           | 1140  |
| Pt/C+RuO <sub>2</sub> | 0.98                        | 0.84               | 1.59                                   | 1.69  | 750                                                            | 850   |

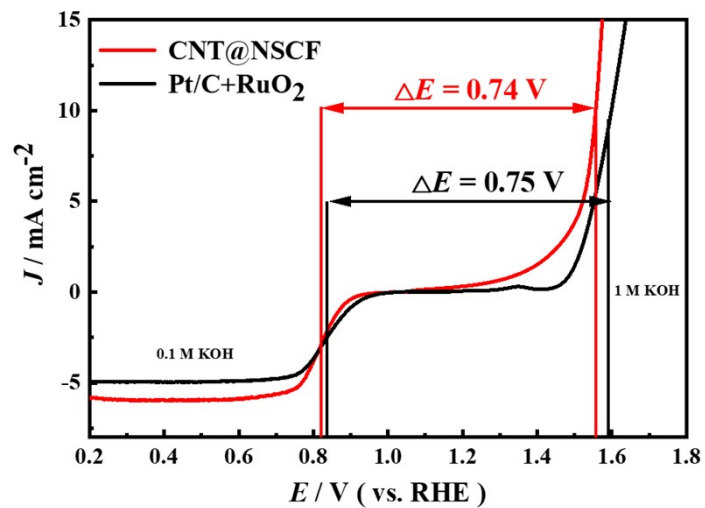

**Figure S28.** The overall polarization curves of CNT@NSCF, 20 wt. % Pt/C, and RuO<sub>2</sub> catalysts.

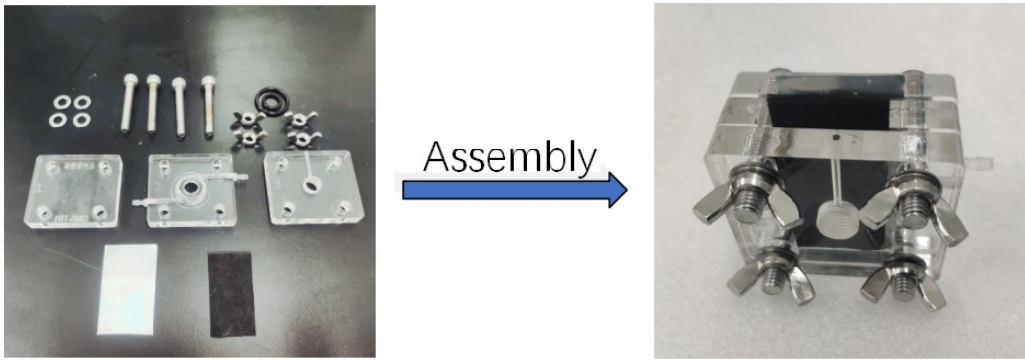

**Figure S29.** Assembly drawing of Zn-air battery.
